# Supplementary material
Source: PubMed Central journal article supplement (PMC8327194)

## **WEB MATERIAL**

### **Propensity Score Weighting and Trimming Strategies for Reducing Variance and Bias of Treatment Effect Estimates: A Simulation Study**

Til Stürmer, Michael Webster-Clark, Jennifer L. Lund, Richard Wyss, Alan R. Ellis, Mark Lunt, Kenneth J. Rothman, and Robert J. Glynn

Table of Contents:

Web Tables 1–6

Web Figures 1 and 2

**Web Table 1.** Mean incidence rate ratios, empirical variance, mean square error, and percent coverage of 95% confidence intervals from 5,000 simulated studies without unmeasured confounding according to treatment prevalence<sup>a</sup>

|                           | Treatment prevalence = 20% |                  |                  |                 | Treatment prevalence = 50% |                  |                  |                 | Treatment prevalence = 80% |                  |                  |                 |
|---------------------------|----------------------------|------------------|------------------|-----------------|----------------------------|------------------|------------------|-----------------|----------------------------|------------------|------------------|-----------------|
|                           | RR                         | Var <sup>b</sup> | MSE <sup>d</sup> | RE <sup>e</sup> | RR                         | Var <sup>b</sup> | MSE <sup>c</sup> | RE <sup>d</sup> | RR                         | Var <sup>b</sup> | MSE <sup>c</sup> | RE <sup>d</sup> |
| Crude                     | 1.77                       | 0.0049           | 0.3300           | <b>127</b>      | 1.83                       | 0.0037           | 0.3695           | <b>129</b>      | 2.05                       | 0.0065           | 0.5188           | <b>205</b>      |
| True outcome model        | 1.00                       | 0.0048           | 0.0049           | <b>130</b>      | 1.00                       | 0.0037           | 0.0037           | <b>130</b>      | 1.00                       | 0.0058           | 0.0058           | <b>228</b>      |
| IPTW <sup>a</sup>         |                            |                  |                  |                 |                            |                  |                  |                 |                            |                  |                  |                 |
| No trimming               | 1.00                       | 0.0063           | 0.0063           | <b>100</b>      | 1.00                       | 0.0048           | 0.0048           | <b>100</b>      | 1.01                       | 0.0133           | 0.0133           | <b>100</b>      |
| Common range <sup>e</sup> | 0.99                       | 0.0062           | 0.0064           | <b>101</b>      | 0.99                       | 0.0047           | 0.0048           | <b>101</b>      | 0.98                       | 0.0128           | 0.0130           | <b>104</b>      |
| Stürmer <sup>e</sup>      | 0.99                       | 0.0080           | 0.0081           | <b>78</b>       | 1.00                       | 0.0051           | 0.0051           | <b>95</b>       | 1.00                       | 0.0095           | 0.0095           | <b>140</b>      |
| Walker <sup>e</sup>       | 0.99                       | 0.0097           | 0.0098           | <b>65</b>       | 1.00                       | 0.0060           | 0.0060           | <b>79</b>       | 1.01                       | 0.0111           | 0.0111           | <b>120</b>      |
| Crump <sup>e</sup>        | 1.00                       | 0.0056           | 0.0056           | <b>112</b>      | 1.00                       | 0.0043           | 0.0043           | <b>111</b>      | 1.01                       | 0.0105           | 0.0105           | <b>126</b>      |
| SMR-treated weights       |                            |                  |                  |                 |                            |                  |                  |                 |                            |                  |                  |                 |
| No trimming               | 1.00                       | 0.0063           | 0.0063           | <b>100</b>      | 1.00                       | 0.0065           | 0.0065           | <b>74</b>       | 1.01                       | 0.0150           | 0.0151           | <b>88</b>       |
| Common range              | 0.99                       | 0.0062           | 0.0062           | <b>102</b>      | 0.99                       | 0.0063           | 0.0064           | <b>76</b>       | 0.98                       | 0.0145           | 0.0147           | <b>92</b>       |
| Stürmer                   | 1.00                       | 0.0075           | 0.0075           | <b>84</b>       | 1.00                       | 0.0054           | 0.0054           | <b>88</b>       | 1.01                       | 0.0101           | 0.0101           | <b>132</b>      |
| Walker                    | 0.99                       | 0.0092           | 0.0092           | <b>69</b>       | 1.00                       | 0.0064           | 0.0064           | <b>75</b>       | 1.01                       | 0.0116           | 0.0116           | <b>114</b>      |
| Crump                     | 1.00                       | 0.0063           | 0.0063           | <b>99</b>       | 1.00                       | 0.0053           | 0.0053           | <b>91</b>       | 1.01                       | 0.0113           | 0.0114           | <b>117</b>      |
| SMR-untreated weights     |                            |                  |                  |                 |                            |                  |                  |                 |                            |                  |                  |                 |
| No trimming               | 0.99                       | 0.0080           | 0.0081           | <b>78</b>       | 1.00                       | 0.0047           | 0.0047           | <b>102</b>      | 1.00                       | 0.0065           | 0.0065           | <b>205</b>      |
| Common range              | 0.99                       | 0.0079           | 0.0081           | <b>80</b>       | 1.00                       | 0.0047           | 0.0047           | <b>103</b>      | 1.00                       | 0.0065           | 0.0065           | <b>206</b>      |
| Stürmer                   | 0.99                       | 0.0088           | 0.0088           | <b>72</b>       | 1.00                       | 0.0054           | 0.0054           | <b>89</b>       | 1.00                       | 0.0082           | 0.0082           | <b>161</b>      |
| Walker                    | 0.99                       | 0.0104           | 0.0104           | <b>61</b>       | 1.00                       | 0.0063           | 0.0063           | <b>76</b>       | 1.00                       | 0.0103           | 0.0103           | <b>129</b>      |
| Crump                     | 1.00                       | 0.0064           | 0.0065           | <b>98</b>       | 1.00                       | 0.0046           | 0.0046           | <b>104</b>      | 1.00                       | 0.0100           | 0.0100           | <b>133</b>      |
| Overlap weights           |                            |                  |                  |                 |                            |                  |                  |                 |                            |                  |                  |                 |
| No trimming               | 1.00                       | 0.0051           | 0.0051           | <b>123</b>      | 1.00                       | 0.0039           | 0.0039           | <b>124</b>      | 1.00                       | 0.0063           | 0.0063           | <b>212</b>      |
| Common range              | 1.00                       | 0.0051           | 0.0051           | <b>123</b>      | 1.00                       | 0.0039           | 0.0039           | <b>124</b>      | 1.00                       | 0.0063           | 0.0063           | <b>212</b>      |
| Stürmer                   | 1.00                       | 0.0073           | 0.0074           | <b>86</b>       | 1.00                       | 0.0050           | 0.0050           | <b>96</b>       | 1.00                       | 0.0081           | 0.0081           | <b>163</b>      |
| Walker                    | 0.99                       | 0.0091           | 0.0091           | <b>69</b>       | 1.00                       | 0.0060           | 0.0060           | <b>80</b>       | 1.00                       | 0.0102           | 0.0102           | <b>130</b>      |
| Crump                     | 1.00                       | 0.0052           | 0.0052           | <b>120</b>      | 1.00                       | 0.0039           | 0.0039           | <b>122</b>      | 1.00                       | 0.0095           | 0.0095           | <b>140</b>      |
| Matching weights          |                            |                  |                  |                 |                            |                  |                  |                 |                            |                  |                  |                 |
| No trimming               | 1.00                       | 0.0053           | 0.0053           | <b>118</b>      | 1.00                       | 0.0039           | 0.0039           | <b>123</b>      | 1.00                       | 0.0063           | 0.0063           | <b>211</b>      |
| Common range              | 1.00                       | 0.0053           | 0.0053           | <b>118</b>      | 1.00                       | 0.0039           | 0.0039           | <b>123</b>      | 1.00                       | 0.0063           | 0.0063           | <b>211</b>      |

|                 |      |        |        |            |      |        |        |            |      |        |        |            |
|-----------------|------|--------|--------|------------|------|--------|--------|------------|------|--------|--------|------------|
| Stürmer         | 1.00 | 0.0075 | 0.0075 | <b>84</b>  | 1.00 | 0.0051 | 0.0051 | <b>95</b>  | 1.00 | 0.0082 | 0.0082 | <b>161</b> |
| Walker          | 0.99 | 0.0092 | 0.0092 | <b>69</b>  | 1.00 | 0.0061 | 0.0061 | <b>79</b>  | 1.00 | 0.0103 | 0.0103 | <b>129</b> |
| Crump           | 1.00 | 0.0054 | 0.0054 | <b>116</b> | 1.00 | 0.0040 | 0.0040 | <b>121</b> | 1.00 | 0.0097 | 0.0097 | <b>137</b> |
| Entropy weights |      |        |        |            |      |        |        |            |      |        |        |            |
| No trimming     | 1.00 | 0.0051 | 0.0051 | <b>123</b> | 1.00 | 0.0039 | 0.0039 | <b>122</b> | 1.00 | 0.0066 | 0.0066 | <b>202</b> |
| Common range    | 1.00 | 0.0051 | 0.0051 | <b>123</b> | 1.00 | 0.0039 | 0.0039 | <b>122</b> | 1.00 | 0.0066 | 0.0066 | <b>202</b> |
| Stürmer         | 1.00 | 0.0074 | 0.0074 | <b>85</b>  | 1.00 | 0.0050 | 0.0050 | <b>96</b>  | 1.00 | 0.0082 | 0.0083 | <b>161</b> |
| Walker          | 0.99 | 0.0091 | 0.0091 | <b>69</b>  | 1.00 | 0.0060 | 0.0060 | <b>80</b>  | 1.00 | 0.0103 | 0.0103 | <b>129</b> |
| Crump           | 1.00 | 0.0053 | 0.0053 | <b>120</b> | 1.00 | 0.0040 | 0.0040 | <b>121</b> | 1.00 | 0.0096 | 0.0096 | <b>138</b> |

IPTW: Inverse probability of treatment weights; average treatment effect in the overall population; SMR-treated weights: Standardized mortality ratio weights; average treatment effect in the treated; SMR-untreated weights: Standardized mortality ratio weights; average treatment effect in the untreated; RR: incidence rate ratio; AUC: area under the receiver operating characteristics curve (c-statistic)

<sup>a</sup> True RR=1.0; AUC=0.75

<sup>b</sup> Variance of treatment effect estimates [ $\log(\text{RR})$ ] over 5,000 simulated studies

<sup>c</sup> Mean squared error; mean of  $[\log(\text{RR}) - \log(1.0)]^2$  over 5,000 simulated studies

<sup>d</sup> Relative efficiency; mean variance of untrimmed IPTW divided by mean variance of scenario times 100 – values above 100 indicate better precision of estimates

<sup>e</sup> No trimming: c-statistic=0.748, 0.750, and 0.765 for treatment prevalence=20, 50, and 80%, respectively; Common range: restricting to positivity (c-statistic=0.744, 0.747, and 0.762 for treatment prevalence=20, 50, and 80%, respectively); Stürmer: asymmetric trimming at 5<sup>th</sup> percentile of treated and 95<sup>th</sup> percentile of untreated (c-statistic=0.657, 0.659, and 0.671 for treatment prevalence=20, 50, and 80%, respectively); Walker: preference score trimming below 0.3 and above 0.7 (c-statistic=0.630, 0.630, and 0.632 for treatment prevalence=20, 50, and 80%, respectively); and Crump: propensity score trimming below 0.1 and above 0.9 (c-statistic=0.684, 0.733, and 0.713 for treatment prevalence=20, 50, and 80%, respectively)

**Web Table 2.** Mean incidence rate ratios, empirical variance, mean square error, and percent coverage of 95% confidence intervals from 5,000 simulated studies without unmeasured confounding according to treatment prevalence<sup>a</sup>

|                          | Treatment prevalence = 20% |                  |                  |                 | Treatment prevalence = 50% |                  |                  |                 | Treatment prevalence = 80% |                  |                  |                 |
|--------------------------|----------------------------|------------------|------------------|-----------------|----------------------------|------------------|------------------|-----------------|----------------------------|------------------|------------------|-----------------|
|                          | RR                         | Var <sup>c</sup> | MSE <sup>d</sup> | RE <sup>e</sup> | RR                         | Var <sup>c</sup> | MSE <sup>d</sup> | RE <sup>e</sup> | RR                         | Var <sup>c</sup> | MSE <sup>d</sup> | RE <sup>e</sup> |
| Crude                    | 1.92                       | 0.0049           | 0.4295           | <b>333</b>      | 1.94                       | 0.0037           | 0.4455           | <b>388</b>      | 2.20                       | 0.0069           | 0.6286           | <b>739</b>      |
| True outcome model       | 1.00                       | 0.0060           | 0.0060           | <b>271</b>      | 1.00                       | 0.0045           | 0.0045           | <b>317</b>      | 1.00                       | 0.0070           | 0.0070           | <b>731</b>      |
| IPTW <sup>a</sup>        |                            |                  |                  |                 |                            |                  |                  |                 |                            |                  |                  |                 |
| No trimming <sup>b</sup> | 0.99                       | 0.0162           | 0.0163           | <b>100</b>      | 1.00                       | 0.0142           | 0.0142           | <b>100</b>      | 1.04                       | 0.0509           | 0.0522           | <b>100</b>      |
| Common range             | 0.96                       | 0.0157           | 0.0170           | <b>104</b>      | 0.98                       | 0.0138           | 0.0144           | <b>103</b>      | 0.98                       | 0.0487           | 0.0491           | <b>105</b>      |
| Stürmer                  | 0.99                       | 0.0120           | 0.0121           | <b>135</b>      | 1.00                       | 0.0069           | 0.0069           | <b>205</b>      | 1.01                       | 0.0136           | 0.0136           | <b>375</b>      |
| Walker                   | 0.99                       | 0.0161           | 0.0161           | <b>101</b>      | 1.00                       | 0.0095           | 0.0095           | <b>149</b>      | 1.01                       | 0.0171           | 0.0171           | <b>298</b>      |
| Crump                    | 1.00                       | 0.0076           | 0.0076           | <b>214</b>      | 1.00                       | 0.0059           | 0.0059           | <b>241</b>      | 1.00                       | 0.0124           | 0.0124           | <b>409</b>      |
| SMR-treated weights      |                            |                  |                  |                 |                            |                  |                  |                 |                            |                  |                  |                 |
| No trimming              | 1.00                       | 0.0154           | 0.0154           | <b>105</b>      | 1.01                       | 0.0244           | 0.0244           | <b>58</b>       | 1.04                       | 0.0599           | 0.0617           | <b>85</b>       |
| Common range             | 0.99                       | 0.0150           | 0.0152           | <b>108</b>      | 0.98                       | 0.0236           | 0.0239           | <b>60</b>       | 0.98                       | 0.0576           | 0.0578           | <b>88</b>       |
| Stürmer                  | 1.00                       | 0.0106           | 0.0106           | <b>154</b>      | 1.00                       | 0.0079           | 0.0079           | <b>181</b>      | 1.01                       | 0.0152           | 0.0152           | <b>336</b>      |
| Walker                   | 1.00                       | 0.0152           | 0.0152           | <b>107</b>      | 1.00                       | 0.0102           | 0.0102           | <b>139</b>      | 1.01                       | 0.0181           | 0.0181           | <b>282</b>      |
| Crump                    | 1.00                       | 0.0103           | 0.0103           | <b>157</b>      | 1.00                       | 0.0078           | 0.0078           | <b>181</b>      | 1.00                       | 0.0146           | 0.0146           | <b>350</b>      |
| SMR-untreated weights    |                            |                  |                  |                 |                            |                  |                  |                 |                            |                  |                  |                 |
| No trimming              | 0.99                       | 0.0260           | 0.0261           | <b>63</b>       | 1.00                       | 0.0100           | 0.0100           | <b>142</b>      | 1.00                       | 0.0101           | 0.0101           | <b>505</b>      |
| Common range             | 0.96                       | 0.0248           | 0.0265           | <b>66</b>       | 0.98                       | 0.0097           | 0.0100           | <b>146</b>      | 0.99                       | 0.0099           | 0.0100           | <b>513</b>      |
| Stürmer                  | 0.99                       | 0.0139           | 0.0140           | <b>117</b>      | 1.00                       | 0.0078           | 0.0078           | <b>183</b>      | 1.00                       | 0.0114           | 0.0114           | <b>449</b>      |
| Walker                   | 0.99                       | 0.0172           | 0.0173           | <b>94</b>       | 1.00                       | 0.0100           | 0.0100           | <b>143</b>      | 1.01                       | 0.0159           | 0.0159           | <b>320</b>      |
| Crump                    | 1.00                       | 0.0094           | 0.0094           | <b>173</b>      | 1.00                       | 0.0071           | 0.0071           | <b>200</b>      | 1.00                       | 0.0131           | 0.0131           | <b>389</b>      |
| Overlap weights          |                            |                  |                  |                 |                            |                  |                  |                 |                            |                  |                  |                 |
| No trimming              | 1.00                       | 0.0065           | 0.0065           | <b>249</b>      | 1.00                       | 0.0049           | 0.0049           | <b>292</b>      | 1.00                       | 0.0079           | 0.0079           | <b>644</b>      |
| Common range             | 1.00                       | 0.0065           | 0.0065           | <b>249</b>      | 1.00                       | 0.0049           | 0.0049           | <b>292</b>      | 1.00                       | 0.0079           | 0.0079           | <b>644</b>      |
| Stürmer                  | 1.00                       | 0.0102           | 0.0102           | <b>160</b>      | 1.00                       | 0.0068           | 0.0068           | <b>208</b>      | 1.00                       | 0.0111           | 0.0111           | <b>459</b>      |
| Walker                   | 0.99                       | 0.0149           | 0.0149           | <b>109</b>      | 1.00                       | 0.0095           | 0.0095           | <b>149</b>      | 1.01                       | 0.0157           | 0.0157           | <b>324</b>      |
| Crump                    | 1.00                       | 0.0070           | 0.0070           | <b>231</b>      | 1.00                       | 0.0053           | 0.0053           | <b>268</b>      | 1.00                       | 0.0111           | 0.0111           | <b>460</b>      |
| Matching weights         |                            |                  |                  |                 |                            |                  |                  |                 |                            |                  |                  |                 |
| No trimming              | 1.00                       | 0.0068           | 0.0068           | <b>240</b>      | 1.00                       | 0.0050           | 0.0050           | <b>284</b>      | 1.00                       | 0.0081           | 0.0081           | <b>629</b>      |
| Common range             | 1.00                       | 0.0068           | 0.0068           | <b>240</b>      | 1.00                       | 0.0050           | 0.0050           | <b>284</b>      | 1.00                       | 0.0081           | 0.0081           | <b>630</b>      |

|                 |      |        |        |            |      |        |        |            |      |        |        |            |
|-----------------|------|--------|--------|------------|------|--------|--------|------------|------|--------|--------|------------|
| Stürmer         | 1.00 | 0.0106 | 0.0106 | <b>154</b> | 1.00 | 0.0070 | 0.0070 | <b>204</b> | 1.00 | 0.0113 | 0.0114 | <b>449</b> |
| Walker          | 1.00 | 0.0152 | 0.0152 | <b>107</b> | 1.00 | 0.0096 | 0.0096 | <b>147</b> | 1.01 | 0.0159 | 0.0159 | <b>320</b> |
| Crump           | 1.00 | 0.0073 | 0.0073 | <b>223</b> | 1.00 | 0.0055 | 0.0054 | <b>261</b> | 1.00 | 0.0113 | 0.0113 | <b>449</b> |
| Entropy weights |      |        |        |            |      |        |        |            |      |        |        |            |
| No trimming     | 1.00 | 0.0066 | 0.0066 | <b>246</b> | 1.00 | 0.0050 | 0.0050 | <b>285</b> | 1.00 | 0.0085 | 0.0085 | <b>598</b> |
| Common range    | 1.00 | 0.0066 | 0.0066 | <b>245</b> | 1.00 | 0.0050 | 0.0050 | <b>285</b> | 1.00 | 0.0085 | 0.0085 | <b>599</b> |
| Stürmer         | 1.00 | 0.0102 | 0.0102 | <b>159</b> | 1.00 | 0.0069 | 0.0069 | <b>207</b> | 1.00 | 0.0113 | 0.0113 | <b>453</b> |
| Walker          | 0.99 | 0.0149 | 0.0150 | <b>109</b> | 1.00 | 0.0095 | 0.0095 | <b>149</b> | 1.01 | 0.0158 | 0.0158 | <b>323</b> |
| Crump           | 1.00 | 0.0070 | 0.0070 | <b>231</b> | 1.00 | 0.0053 | 0.0053 | <b>266</b> | 1.00 | 0.0112 | 0.0112 | <b>456</b> |

IPTW: Inverse probability of treatment weights; average treatment effect in the overall population; SMR-treated weights: Standardized mortality ratio weights; average treatment effect in the treated; SMR-untreated weights: Standardized mortality ratio weights; average treatment effect in the untreated; RR: incidence rate ratio; AUC: Area under the receiver operating characteristics curve (c-statistic)

<sup>a</sup> True RR=1.0; AUC=0.85

<sup>b</sup> Common range: restricting to positivity; Stürmer: asymmetric trimming at 5<sup>th</sup> percentile of treated and 95<sup>th</sup> percentile of untreated; Walker: preference score trimming below 0.3 and above 0.7; and Crump: propensity score trimming below 0.1 and above 0.9

<sup>c</sup> Variance of treatment effect estimates [ $\log(\text{RR})$ ] over 5,000 simulated studies

<sup>d</sup> Mean squared error; mean of  $[\log(\text{RR}) - \log(1.0)]^2$  over 5,000 simulated studies

<sup>e</sup> Relative efficiency; mean variance of untrimmed IPTW divided by mean variance of scenario times 100 – values above 100 indicate better precision of estimates

**Web Table 3.** Mean incidence rate ratios, empirical variance, mean square error, and percent coverage of 95% confidence intervals from 5,000 simulated studies without unmeasured confounding according to treatment prevalence<sup>a</sup>

|                           | Treatment prevalence = 20% |                  |                  |                 | Treatment prevalence = 50% |                  |                  |                 | Treatment prevalence = 80% |                  |                  |                 |
|---------------------------|----------------------------|------------------|------------------|-----------------|----------------------------|------------------|------------------|-----------------|----------------------------|------------------|------------------|-----------------|
|                           | RR                         | Var <sup>b</sup> | MSE <sup>c</sup> | RE <sup>d</sup> | RR                         | Var <sup>b</sup> | MSE <sup>c</sup> | RE <sup>d</sup> | RR                         | Var <sup>b</sup> | MSE <sup>c</sup> | RE <sup>d</sup> |
| Crude                     | 1.33                       | 0.0055           | 0.0855           | <b>98</b>       | 1.34                       | 0.0043           | 0.0914           | <b>98</b>       | 1.38                       | 0.0079           | 0.1102           | <b>115</b>      |
| True outcome model        | 1.00                       | 0.0049           | 0.0049           | <b>109</b>      | 1.00                       | 0.0039           | 0.0039           | <b>107</b>      | 1.00                       | 0.0071           | 0.0071           | <b>128</b>      |
| IPTW                      |                            |                  |                  |                 |                            |                  |                  |                 |                            |                  |                  |                 |
| No trimming               | 1.00                       | 0.0054           | 0.0054           | <b>100</b>      | 1.00                       | 0.0042           | 0.0042           | <b>100</b>      | 1.00                       | 0.0091           | 0.0091           | <b>100</b>      |
| Common range <sup>e</sup> | 1.00                       | 0.0054           | 0.0054           | <b>100</b>      | 1.00                       | 0.0042           | 0.0042           | <b>100</b>      | 1.00                       | 0.0090           | 0.0090           | <b>101</b>      |
| Stürmer <sup>e</sup>      | 1.00                       | 0.0067           | 0.0067           | <b>80</b>       | 1.00                       | 0.0049           | 0.0049           | <b>86</b>       | 1.00                       | 0.0094           | 0.0094           | <b>97</b>       |
| Walker <sup>e</sup>       | 1.00                       | 0.0063           | 0.0063           | <b>85</b>       | 1.00                       | 0.0046           | 0.0046           | <b>91</b>       | 1.00                       | 0.0090           | 0.0090           | <b>101</b>      |
| Crump <sup>e</sup>        | 1.00                       | 0.0054           | 0.0054           | <b>100</b>      | 1.00                       | 0.0042           | 0.0042           | <b>100</b>      | 1.00                       | 0.0091           | 0.0091           | <b>99</b>       |
| SMR-treated weights       |                            |                  |                  |                 |                            |                  |                  |                 |                            |                  |                  |                 |
| No trimming               | 1.00                       | 0.0054           | 0.0054           | <b>100</b>      | 1.00                       | 0.0047           | 0.0047           | <b>89</b>       | 1.00                       | 0.0097           | 0.0097           | <b>93</b>       |
| Common range              | 1.00                       | 0.0054           | 0.0054           | <b>100</b>      | 1.00                       | 0.0047           | 0.0047           | <b>89</b>       | 1.00                       | 0.0096           | 0.0097           | <b>94</b>       |
| Stürmer                   | 1.00                       | 0.0066           | 0.0066           | <b>81</b>       | 1.00                       | 0.0051           | 0.0051           | <b>82</b>       | 1.00                       | 0.0097           | 0.0097           | <b>94</b>       |
| Walker                    | 1.00                       | 0.0062           | 0.0062           | <b>86</b>       | 1.00                       | 0.0048           | 0.0048           | <b>87</b>       | 1.00                       | 0.0093           | 0.0093           | <b>97</b>       |
| Crump                     | 1.00                       | 0.0054           | 0.0054           | <b>99</b>       | 1.00                       | 0.0047           | 0.0047           | <b>89</b>       | 1.00                       | 0.0095           | 0.0095           | <b>96</b>       |
| SMR-untreated weights     |                            |                  |                  |                 |                            |                  |                  |                 |                            |                  |                  |                 |
| No trimming               | 1.00                       | 0.0057           | 0.0057           | <b>94</b>       | 1.00                       | 0.0041           | 0.0041           | <b>101</b>      | 1.00                       | 0.0073           | 0.0073           | <b>124</b>      |
| Common range              | 1.00                       | 0.0057           | 0.0057           | <b>94</b>       | 1.00                       | 0.0041           | 0.0041           | <b>101</b>      | 1.00                       | 0.0073           | 0.0073           | <b>124</b>      |
| Stürmer                   | 1.00                       | 0.0069           | 0.0069           | <b>78</b>       | 1.00                       | 0.0049           | 0.0049           | <b>85</b>       | 1.00                       | 0.0087           | 0.0087           | <b>105</b>      |
| Walker                    | 1.00                       | 0.0065           | 0.0066           | <b>82</b>       | 1.00                       | 0.0046           | 0.0046           | <b>90</b>       | 1.00                       | 0.0082           | 0.0082           | <b>111</b>      |
| Crump                     | 1.00                       | 0.0057           | 0.0057           | <b>94</b>       | 1.00                       | 0.0041           | 0.0041           | <b>101</b>      | 1.00                       | 0.0083           | 0.0083           | <b>109</b>      |
| Overlap weights           |                            |                  |                  |                 |                            |                  |                  |                 |                            |                  |                  |                 |
| No trimming               | 1.00                       | 0.0052           | 0.0052           | <b>104</b>      | 1.00                       | 0.0041           | 0.0041           | <b>103</b>      | 1.00                       | 0.0074           | 0.0074           | <b>123</b>      |
| Common range              | 1.00                       | 0.0052           | 0.0052           | <b>104</b>      | 1.00                       | 0.0041           | 0.0041           | <b>103</b>      | 1.00                       | 0.0074           | 0.0074           | <b>123</b>      |
| Stürmer                   | 1.00                       | 0.0065           | 0.0066           | <b>82</b>       | 1.00                       | 0.0048           | 0.0048           | <b>86</b>       | 1.00                       | 0.0087           | 0.0087           | <b>104</b>      |
| Walker                    | 1.00                       | 0.0061           | 0.0061           | <b>88</b>       | 1.00                       | 0.0045           | 0.0045           | <b>92</b>       | 1.00                       | 0.0082           | 0.0082           | <b>110</b>      |
| Crump                     | 1.00                       | 0.0052           | 0.0052           | <b>103</b>      | 1.00                       | 0.0041           | 0.0041           | <b>103</b>      | 1.00                       | 0.0084           | 0.0084           | <b>108</b>      |
| Matching weights          |                            |                  |                  |                 |                            |                  |                  |                 |                            |                  |                  |                 |
| No trimming               | 1.00                       | 0.0053           | 0.0053           | <b>101</b>      | 1.00                       | 0.0041           | 0.0041           | <b>102</b>      | 1.00                       | 0.0073           | 0.0073           | <b>124</b>      |
| Common range              | 1.00                       | 0.0053           | 0.0053           | <b>101</b>      | 1.00                       | 0.0041           | 0.0041           | <b>102</b>      | 1.00                       | 0.0073           | 0.0073           | <b>124</b>      |

|                 |      |        |        |            |      |        |        |            |      |        |        |            |
|-----------------|------|--------|--------|------------|------|--------|--------|------------|------|--------|--------|------------|
| Stürmer         | 1.00 | 0.0066 | 0.0066 | <b>81</b>  | 1.00 | 0.0049 | 0.0049 | <b>86</b>  | 1.00 | 0.0087 | 0.0087 | <b>105</b> |
| Walker          | 1.00 | 0.0062 | 0.0062 | <b>86</b>  | 1.00 | 0.0046 | 0.0046 | <b>91</b>  | 1.00 | 0.0082 | 0.0082 | <b>111</b> |
| Crump           | 1.00 | 0.0054 | 0.0054 | <b>100</b> | 1.00 | 0.0041 | 0.0041 | <b>102</b> | 1.00 | 0.0083 | 0.0083 | <b>109</b> |
| Entropy weights |      |        |        |            |      |        |        |            |      |        |        |            |
| No trimming     | 1.00 | 0.0051 | 0.0051 | <b>104</b> | 1.00 | 0.0041 | 0.0041 | <b>102</b> | 1.00 | 0.008  | 0.008  | <b>120</b> |
| Common range    | 1.00 | 0.0051 | 0.0051 | <b>104</b> | 1.00 | 0.0041 | 0.0041 | <b>102</b> | 1.00 | 0.008  | 0.008  | <b>120</b> |
| Stürmer         | 1.00 | 0.0065 | 0.0065 | <b>82</b>  | 1.00 | 0.0048 | 0.0048 | <b>86</b>  | 1.00 | 0.009  | 0.009  | <b>103</b> |
| Walker          | 1.00 | 0.0061 | 0.0061 | <b>88</b>  | 1.00 | 0.0045 | 0.0045 | <b>92</b>  | 1.00 | 0.008  | 0.008  | <b>109</b> |
| Crump           | 1.00 | 0.0052 | 0.0052 | <b>103</b> | 1.00 | 0.0041 | 0.0041 | <b>102</b> | 1.00 | 0.008  | 0.008  | <b>107</b> |

IPTW: Inverse probability of treatment weights; average treatment effect in the overall population; SMR-treated weights: Standardized mortality ratio weights; average treatment effect in the treated; SMR-untreated weights: Standardized mortality ratio weights; average treatment effect in the untreated; RR: incidence rate ratio; AUC: Area under the receiver operating characteristics curve (c-statistic)

<sup>a</sup> True RR=1.0; AUC=0.65

<sup>b</sup> Variance of treatment effect estimates [ $\log(\text{RR})$ ] over 5,000 simulated studies

<sup>c</sup> Mean squared error; mean of [ $\log(\text{RR}) - \log(1.0)$ ]<sup>2</sup> over 5,000 simulated studies

<sup>d</sup> Relative efficiency; mean variance of untrimmed IPTW divided by mean variance of scenario times 100 – values above 100 indicate better precision of estimates

<sup>e</sup> Common range: restricting to positivity; Stürmer: asymmetric trimming at 5<sup>th</sup> percentile of treated and 95<sup>th</sup> percentile of untreated; Walker: preference score trimming below 0.3 and above 0.7; and Crump: propensity score trimming below 0.1 and above 0.9

**Web Table 4.** Mean incidence rate ratios (RR), empirical variance, mean square error, and percent coverage of 95% confidence intervals from 5,000 simulated studies with unmeasured confounding leading to treatment contrary to prediction according unmeasured confounding pattern<sup>a</sup>

|                           | Last Resort Treatment |                  |                  |                  | Treatment Withheld |                  |                  |                  | Last Resort and Withheld |                  |                  |                  |
|---------------------------|-----------------------|------------------|------------------|------------------|--------------------|------------------|------------------|------------------|--------------------------|------------------|------------------|------------------|
|                           | RR                    | Var <sup>b</sup> | MSE <sup>c</sup> | Cov <sup>d</sup> | RR                 | Var <sup>b</sup> | MSE <sup>c</sup> | Cov <sup>d</sup> | RR                       | Var <sup>b</sup> | MSE <sup>c</sup> | Cov <sup>d</sup> |
| Crude                     | 3.60                  | 0.0031           | 0.3484           | 0                | 2.95               | 0.0068           | 0.1579           | 0                | 2.91                     | 0.0067           | 0.1465           | 0                |
| Residual confounding      | 2.06                  | 0.0030           | 0.0037           | 92               | 1.36               | 0.0065           | 0.1548           | 0                | 1.40                     | 0.0065           | 0.1352           | 0                |
| True outcome model        | 2.00                  | 0.0028           | 0.0028           | 95               | 2.00               | 0.0032           | 0.0032           | 95               | 2.00                     | 0.0032           | 0.0032           | 95               |
| IPTW                      |                       |                  |                  |                  |                    |                  |                  |                  |                          |                  |                  |                  |
| No trimming               | 2.09                  | 0.0041           | 0.0061           | 90               | 1.08               | 0.0167           | 0.4019           | 0                | 1.15                     | 0.0154           | 0.3198           | 0                |
| Common range <sup>e</sup> | 2.07                  | 0.0040           | 0.0054           | 92               | 1.06               | 0.0162           | 0.4145           | 0                | 1.14                     | 0.0150           | 0.3304           | 0                |
| Stürmer <sup>e</sup>      | 2.00                  | 0.0039           | 0.0039           | 96               | 1.97               | 0.0061           | 0.0064           | 95               | 1.97                     | 0.0060           | 0.0062           | 95               |
| Walker <sup>e</sup>       | 2.00                  | 0.0045           | 0.0045           | 96               | 2.00               | 0.0068           | 0.0068           | 96               | 2.00                     | 0.0065           | 0.0065           | 96               |
| Crump <sup>e</sup>        | 2.07                  | 0.0037           | 0.0050           | 93               | 1.20               | 0.0112           | 0.2761           | 0                | 1.23                     | 0.0113           | 0.2467           | 0                |
| SMR-treated weights       |                       |                  |                  |                  |                    |                  |                  |                  |                          |                  |                  |                  |
| No trimming               | 2.06                  | 0.0056           | 0.0064           | 93               | 0.95               | 0.0226           | 0.5807           | 0                | 1.00                     | 0.0212           | 0.4987           | 0                |
| Common range              | 2.04                  | 0.0055           | 0.0058           | 94               | 0.94               | 0.0218           | 0.5997           | 0                | 0.99                     | 0.0204           | 0.5172           | 0                |
| Stürmer                   | 2.00                  | 0.0044           | 0.0044           | 96               | 1.96               | 0.0071           | 0.0075           | 95               | 1.96                     | 0.0070           | 0.0074           | 95               |
| Walker                    | 2.00                  | 0.0049           | 0.0049           | 96               | 2.00               | 0.0074           | 0.0074           | 96               | 2.00                     | 0.0071           | 0.0071           | 96               |
| Crump                     | 2.04                  | 0.0047           | 0.0050           | 95               | 1.07               | 0.0147           | 0.4063           | 0                | 1.08                     | 0.0150           | 0.3925           | 0                |
| SMR-untreated weights     |                       |                  |                  |                  |                    |                  |                  |                  |                          |                  |                  |                  |
| No trimming               | 2.16                  | 0.0041           | 0.0100           | 81               | 1.49               | 0.0061           | 0.0911           | 5                | 1.61                     | 0.0066           | 0.0536           | 28               |
| Common range              | 2.16                  | 0.0041           | 0.0097           | 82               | 1.49               | 0.0061           | 0.0937           | 4                | 1.61                     | 0.0066           | 0.0549           | 27               |
| Stürmer                   | 2.00                  | 0.0040           | 0.0040           | 96               | 1.98               | 0.0058           | 0.0059           | 96               | 1.98                     | 0.0058           | 0.0058           | 96               |
| Walker                    | 2.00                  | 0.0045           | 0.0045           | 96               | 2.00               | 0.0069           | 0.0069           | 96               | 2.00                     | 0.0066           | 0.0066           | 96               |
| Crump                     | 2.14                  | 0.0038           | 0.0081           | 84               | 1.54               | 0.0059           | 0.0730           | 10               | 1.64                     | 0.0063           | 0.0467           | 32               |
| Overlap weights           |                       |                  |                  |                  |                    |                  |                  |                  |                          |                  |                  |                  |
| No trimming               | 2.07                  | 0.0031           | 0.0044           | 92               | 1.31               | 0.0077           | 0.1847           | 0                | 1.37                     | 0.0076           | 0.1501           | 1                |
| Common range              | 2.07                  | 0.0031           | 0.0043           | 93               | 1.31               | 0.0076           | 0.1858           | 0                | 1.37                     | 0.0075           | 0.1515           | 1                |
| Stürmer                   | 2.00                  | 0.0038           | 0.0038           | 96               | 1.98               | 0.0059           | 0.0060           | 95               | 1.98                     | 0.0058           | 0.0059           | 95               |
| Walker                    | 2.00                  | 0.0045           | 0.0045           | 96               | 2.00               | 0.0068           | 0.0068           | 96               | 2.00                     | 0.0064           | 0.0064           | 96               |
| Crump                     | 2.06                  | 0.0032           | 0.0039           | 94               | 1.38               | 0.0074           | 0.1442           | 1                | 1.41                     | 0.0073           | 0.1289           | 2                |
| Matching weights          |                       |                  |                  |                  |                    |                  |                  |                  |                          |                  |                  |                  |
| No trimming               | 2.06                  | 0.0031           | 0.0040           | 93               | 1.42               | 0.0063           | 0.1238           | 1                | 1.47                     | 0.0062           | 0.0999           | 3                |



|                 |      |        |        |    |      |        |        |    |      |        |        |    |
|-----------------|------|--------|--------|----|------|--------|--------|----|------|--------|--------|----|
| Common range    | 2.06 | 0.0031 | 0.0040 | 93 | 1.42 | 0.0063 | 0.1243 | 1  | 1.47 | 0.0062 | 0.1006 | 3  |
| Stürmer         | 2.00 | 0.0039 | 0.0039 | 96 | 1.98 | 0.0058 | 0.0059 | 96 | 1.98 | 0.0057 | 0.0058 | 95 |
| Walker          | 2.00 | 0.0045 | 0.0045 | 96 | 2.00 | 0.0068 | 0.0068 | 96 | 2.00 | 0.0065 | 0.0065 | 96 |
| Crump           | 2.05 | 0.0031 | 0.0037 | 94 | 1.48 | 0.0062 | 0.0975 | 3  | 1.51 | 0.0062 | 0.0866 | 5  |
| Entropy weights |      |        |        |    |      |        |        |    |      |        |        |    |
| No trimming     | 2.08 | 0.0032 | 0.0047 | 92 | 1.25 | 0.0089 | 0.2270 | 0  | 1.32 | 0.0087 | 0.1833 | 1  |
| Common range    | 2.07 | 0.0032 | 0.0045 | 92 | 1.25 | 0.0088 | 0.2292 | 0  | 1.31 | 0.0086 | 0.1858 | 1  |
| Stürmer         | 2.00 | 0.0039 | 0.0039 | 96 | 1.97 | 0.0059 | 0.0061 | 95 | 1.98 | 0.0058 | 0.0060 | 95 |
| Walker          | 2.00 | 0.0045 | 0.0045 | 96 | 2.00 | 0.0068 | 0.0068 | 96 | 2.00 | 0.0065 | 0.0065 | 96 |
| Crump           | 2.06 | 0.0032 | 0.0041 | 94 | 1.33 | 0.0081 | 0.1725 | 1  | 1.36 | 0.0081 | 0.1541 | 1  |

IPTW: Inverse probability of treatment weights; average treatment effect in the overall population; SMR-treated weights: Standardized mortality ratio weights; average treatment effect in the treated; SMR-untreated weights: Standardized mortality ratio weights; average treatment effect in the untreated; RR: incidence rate ratio; AUC: Area under the receiver operating characteristics curve (c-statistic)

<sup>a</sup> True RR=2.0; AUC=0.75; treatment prevalence = 50%

<sup>b</sup> Variance of treatment effect estimates [ $\log(\text{RR})$ ] over 5,000 simulated studies

<sup>c</sup> Mean squared error; mean of [ $\log(\text{RR}) - \log(2.0)$ ]<sup>2</sup> over 5,000 simulated studies

<sup>d</sup> Percent of simulated studies in which the 95% confidence interval (CI) includes the true value (RR=2.0)

<sup>e</sup> Common range: restricting to positivity; Stürmer: asymmetric trimming at 5<sup>th</sup> percentile of treated and 95<sup>th</sup> percentile of untreated; Walker: preference score trimming below 0.3 and above 0.7; and Crump: propensity score trimming below 0.1 and above 0.9

**Web Table 5.** Mean incidence rate ratios, empirical variance, mean square error, and percent coverage of 95% confidence intervals from 5,000 simulated studies with unmeasured confounding leading to treatment contrary to prediction according to weighting and trimming method<sup>a</sup>

|                           | Last Resort Treatment |                  |                  |                  | Treatment Withheld |                  |                  |                  | Last Resort and Withheld |                  |                  |                  |
|---------------------------|-----------------------|------------------|------------------|------------------|--------------------|------------------|------------------|------------------|--------------------------|------------------|------------------|------------------|
|                           | RR                    | Var <sup>b</sup> | MSE <sup>c</sup> | Cov <sup>d</sup> | RR                 | Var <sup>b</sup> | MSE <sup>c</sup> | Cov <sup>d</sup> | RR                       | Var <sup>b</sup> | MSE <sup>c</sup> | Cov <sup>d</sup> |
| Crude                     | 3.97                  | 0.0062           | 0.4761           | 0                | 3.07               | 0.0137           | 0.1976           | 0                | 2.98                     | 0.0141           | 0.1738           | 1                |
| Residual confounding      | 2.06                  | 0.0054           | 0.0063           | 94               | 1.35               | 0.0121           | 0.1637           | 2                | 1.39                     | 0.0127           | 0.1457           | 4                |
| True outcome model        | 2.01                  | 0.0053           | 0.0053           | 95               | 2.01               | 0.0057           | 0.0057           | 95               | 2.01                     | 0.0059           | 0.0060           | 95               |
| IPTW                      |                       |                  |                  |                  |                    |                  |                  |                  |                          |                  |                  |                  |
| No trimming               | 2.12                  | 0.0118           | 0.0149           | 90               | 0.98               | 0.0421           | 0.5569           | 2                | 1.06                     | 0.0396           | 0.4423           | 5                |
| Common range <sup>e</sup> | 2.07                  | 0.0113           | 0.0126           | 93               | 0.95               | 0.0404           | 0.5886           | 2                | 1.04                     | 0.0381           | 0.4712           | 4                |
| Stürmer <sup>e</sup>      | 2.01                  | 0.0091           | 0.0091           | 95               | 1.70               | 0.0202           | 0.0459           | 78               | 1.69                     | 0.0209           | 0.0494           | 77               |
| Walker <sup>e</sup>       | 2.01                  | 0.0101           | 0.0101           | 96               | 2.01               | 0.0164           | 0.0164           | 96               | 1.97                     | 0.0171           | 0.0173           | 95               |
| Crump <sup>e</sup>        | 2.12                  | 0.0092           | 0.0127           | 93               | 2.01               | 0.0150           | 0.0151           | 95               | 2.11                     | 0.0151           | 0.0180           | 94               |
| SMR-treated weights       |                       |                  |                  |                  |                    |                  |                  |                  |                          |                  |                  |                  |
| No trimming               | 2.11                  | 0.0133           | 0.0160           | 91               | 0.95               | 0.0455           | 0.6057           | 2                | 1.02                     | 0.0430           | 0.4927           | 4                |
| Common range              | 2.06                  | 0.0128           | 0.0136           | 94               | 0.92               | 0.0436           | 0.6418           | 1                | 1.00                     | 0.0413           | 0.5266           | 3                |
| Stürmer                   | 2.01                  | 0.0097           | 0.0098           | 95               | 1.68               | 0.0220           | 0.0517           | 76               | 1.67                     | 0.0228           | 0.0557           | 76               |
| Walker                    | 2.01                  | 0.0107           | 0.0107           | 95               | 2.01               | 0.0173           | 0.0173           | 95               | 1.97                     | 0.0181           | 0.0184           | 95               |
| Crump                     | 2.09                  | 0.0099           | 0.0119           | 94               | 2.01               | 0.0163           | 0.0163           | 95               | 2.08                     | 0.0161           | 0.0177           | 95               |
| SMR-untreated weights     |                       |                  |                  |                  |                    |                  |                  |                  |                          |                  |                  |                  |
| No trimming               | 2.19                  | 0.0061           | 0.0147           | 83               | 1.40               | 0.0123           | 0.1385           | 12               | 1.53                     | 0.0133           | 0.0863           | 35               |
| Common range              | 2.19                  | 0.0061           | 0.0142           | 84               | 1.40               | 0.0123           | 0.1412           | 12               | 1.52                     | 0.0133           | 0.0881           | 34               |
| Stürmer                   | 2.01                  | 0.0074           | 0.0074           | 96               | 1.84               | 0.0128           | 0.0200           | 88               | 1.83                     | 0.0131           | 0.0209           | 88               |
| Walker                    | 2.01                  | 0.0088           | 0.0088           | 96               | 2.01               | 0.0145           | 0.0145           | 95               | 1.99                     | 0.0145           | 0.0146           | 95               |
| Crump                     | 2.25                  | 0.0087           | 0.0229           | 80               | 2.01               | 0.0132           | 0.0132           | 96               | 2.24                     | 0.0144           | 0.0276           | 86               |
| Overlap weights           |                       |                  |                  |                  |                    |                  |                  |                  |                          |                  |                  |                  |
| No trimming               | 2.14                  | 0.0059           | 0.0104           | 89               | 1.33               | 0.0139           | 0.1806           | 7                | 1.42                     | 0.0144           | 0.1304           | 19               |
| Common range              | 2.13                  | 0.0059           | 0.0100           | 90               | 1.33               | 0.0138           | 0.1824           | 6                | 1.42                     | 0.0144           | 0.1327           | 18               |
| Stürmer                   | 2.01                  | 0.0075           | 0.0075           | 96               | 1.82               | 0.0135           | 0.0227           | 86               | 1.81                     | 0.0138           | 0.0240           | 86               |
| Walker                    | 2.01                  | 0.0089           | 0.0089           | 96               | 2.01               | 0.0145           | 0.0146           | 95               | 1.99                     | 0.0146           | 0.0147           | 95               |
| Crump                     | 2.17                  | 0.0082           | 0.0145           | 89               | 2.01               | 0.0131           | 0.0132           | 95               | 2.16                     | 0.0135           | 0.0193           | 91               |
| Matching weights          |                       |                  |                  |                  |                    |                  |                  |                  |                          |                  |                  |                  |
| No trimming               | 2.17                  | 0.0058           | 0.0123           | 86               | 1.39               | 0.0125           | 0.1441           | 11               | 1.51                     | 0.0131           | 0.0935           | 30               |

|                 |      |        |        |    |      |        |        |    |      |        |        |    |
|-----------------|------|--------|--------|----|------|--------|--------|----|------|--------|--------|----|
| Common range    | 2.16 | 0.0058 | 0.0121 | 87 | 1.39 | 0.0124 | 0.1451 | 11 | 1.50 | 0.0130 | 0.0949 | 30 |
| Stürmer         | 2.01 | 0.0074 | 0.0074 | 96 | 1.84 | 0.0128 | 0.0200 | 88 | 1.83 | 0.0131 | 0.0209 | 88 |
| Walker          | 2.01 | 0.0088 | 0.0088 | 96 | 2.01 | 0.0145 | 0.0145 | 95 | 1.99 | 0.0145 | 0.0146 | 95 |
| Crump           | 2.20 | 0.0082 | 0.0177 | 84 | 2.01 | 0.0131 | 0.0132 | 96 | 2.20 | 0.0136 | 0.0226 | 89 |
| Entropy weights |      |        |        |    |      |        |        |    |      |        |        |    |
| No trimming     | 2.13 | 0.0062 | 0.0102 | 90 | 1.24 | 0.0171 | 0.2462 | 4  | 1.33 | 0.0175 | 0.1851 | 11 |
| Common range    | 2.12 | 0.0062 | 0.0096 | 91 | 1.23 | 0.0169 | 0.2500 | 4  | 1.32 | 0.0173 | 0.1895 | 10 |
| Stürmer         | 2.01 | 0.0077 | 0.0077 | 96 | 1.79 | 0.0146 | 0.0269 | 84 | 1.78 | 0.0149 | 0.0285 | 84 |
| Walker          | 2.01 | 0.0090 | 0.0090 | 96 | 2.01 | 0.0148 | 0.0148 | 95 | 1.98 | 0.0149 | 0.0150 | 95 |
| Crump           | 2.15 | 0.0083 | 0.0138 | 90 | 2.01 | 0.0134 | 0.0134 | 95 | 2.14 | 0.0137 | 0.0186 | 92 |

IPTW: Inverse probability of treatment weights; average treatment effect in the overall population; SMR-treated weights: Standardized mortality ratio weights; average treatment effect in the treated; SMR-untreated weights: Standardized mortality ratio weights; average treatment effect in the untreated; RR: incidence rate ratio; AUC: Area under the receiver operating characteristics curve (c-statistic)

<sup>a</sup> True RR=2.0; AUC=0.75; treatment prevalence = 80%

<sup>b</sup> Variance of treatment effect estimates [ $\log(\text{RR})$ ] over 5,000 simulated studies

<sup>c</sup> Mean squared error; mean of [ $\log(\text{RR}) - \log(2.0)$ ]<sup>2</sup> over 5,000 simulated studies

<sup>d</sup> Percent of simulated studies in which the 95% confidence interval (CI) includes the true value (RR=2.0)

<sup>e</sup> Common range: restricting to positivity; Stürmer: asymmetric trimming at 5<sup>th</sup> percentile of treated and 95<sup>th</sup> percentile of untreated; Walker: preference score trimming below 0.3 and above 0.7; and Crump: propensity score trimming below 0.1 and above 0.9

**Web Table 6.** Mean incidence rate ratios, empirical variance, mean square error, and percent coverage of 95% confidence intervals from 5,000 simulated studies with unmeasured confounding leading to treatment withheld according to c-statistic of propensity score model<sup>a</sup>

|                           | AUC = 0.65 |                  |                  |                  | AUC = 0.75 (see table S4) |                  |                  |                  | AUC = 0.85 |                  |                  |                  |
|---------------------------|------------|------------------|------------------|------------------|---------------------------|------------------|------------------|------------------|------------|------------------|------------------|------------------|
|                           | RR         | Var <sup>b</sup> | MSE <sup>c</sup> | Cov <sup>d</sup> | RR                        | Var <sup>b</sup> | MSE <sup>c</sup> | Cov <sup>d</sup> | RR         | Var <sup>b</sup> | MSE <sup>c</sup> | Cov <sup>d</sup> |
| Crude                     | 2.16       | 0.0057           | 0.0120           | 62               | 2.95                      | 0.0068           | 0.1579           | 0                | 4.03       | 0.0064           | 0.4989           | 0                |
| Residual confounding      | 1.52       | 0.0051           | 0.0801           | 1                | 1.36                      | 0.0065           | 0.1548           | 0                | 1.54       | 0.0076           | 0.0762           | 7                |
| True outcome model        | 2.00       | 0.0032           | 0.0032           | 95               | 2.00                      | 0.0032           | 0.0032           | 95               | 2.00       | 0.0045           | 0.0045           | 95               |
| IPTW                      |            |                  |                  |                  |                           |                  |                  |                  |            |                  |                  |                  |
| No trimming               | 1.40       | 0.0075           | 0.1363           | 1                | 1.08                      | 0.0167           | 0.4019           | 0                | 1.04       | 0.0635           | 0.4930           | 8                |
| Common range <sup>e</sup> | 1.39       | 0.0074           | 0.1377           | 1                | 1.06                      | 0.0162           | 0.4145           | 0                | 1.00       | 0.0603           | 0.5384           | 5                |
| Stürmer <sup>e</sup>      | 1.90       | 0.0052           | 0.0078           | 90               | 1.97                      | 0.0061           | 0.0064           | 95               | 2.01       | 0.0085           | 0.0085           | 95               |
| Walker <sup>e</sup>       | 1.77       | 0.0057           | 0.0212           | 62               | 2.00                      | 0.0068           | 0.0068           | 96               | 2.00       | 0.0110           | 0.0110           | 96               |
| Crump <sup>e</sup>        | 1.40       | 0.0075           | 0.1362           | 1                | 1.20                      | 0.0112           | 0.2761           | 0                | 1.86       | 0.0106           | 0.0156           | 90               |
| SMR-treated weights       |            |                  |                  |                  |                           |                  |                  |                  |            |                  |                  |                  |
| No trimming               | 1.29       | 0.0100           | 0.2029           | 0                | 0.95                      | 0.0226           | 0.5807           | 0                | 0.90       | 0.0828           | 0.7181           | 6                |
| Common range              | 1.28       | 0.0099           | 0.2055           | 0                | 0.94                      | 0.0218           | 0.5997           | 0                | 0.87       | 0.0783           | 0.7798           | 4                |
| Stürmer                   | 1.88       | 0.0058           | 0.0098           | 88               | 1.96                      | 0.0071           | 0.0075           | 95               | 2.01       | 0.0103           | 0.0103           | 95               |
| Walker                    | 1.72       | 0.0069           | 0.0297           | 54               | 2.00                      | 0.0074           | 0.0074           | 96               | 2.01       | 0.0122           | 0.0122           | 95               |
| Crump                     | 1.29       | 0.0100           | 0.2028           | 0                | 1.07                      | 0.0147           | 0.4063           | 0                | 1.80       | 0.0170           | 0.0276           | 87               |
| SMR-untreated weights     |            |                  |                  |                  |                           |                  |                  |                  |            |                  |                  |                  |
| No trimming               | 1.59       | 0.0048           | 0.0588           | 10               | 1.49                      | 0.0061           | 0.0911           | 5                | 1.78       | 0.0093           | 0.0234           | 77               |
| Common range              | 1.58       | 0.0048           | 0.0592           | 10               | 1.49                      | 0.0061           | 0.0937           | 4                | 1.75       | 0.0091           | 0.0268           | 72               |
| Stürmer                   | 1.93       | 0.0047           | 0.0062           | 92               | 1.98                      | 0.0058           | 0.0059           | 96               | 2.00       | 0.0086           | 0.0086           | 95               |
| Walker                    | 1.83       | 0.0048           | 0.0127           | 77               | 2.00                      | 0.0069           | 0.0069           | 96               | 2.00       | 0.0110           | 0.0110           | 96               |
| Crump                     | 1.59       | 0.0048           | 0.0588           | 10               | 1.54                      | 0.0059           | 0.0730           | 10               | 1.97       | 0.0075           | 0.0078           | 95               |
| Overlap weights           |            |                  |                  |                  |                           |                  |                  |                  |            |                  |                  |                  |
| No trimming               | 1.48       | 0.0059           | 0.0964           | 2                | 1.31                      | 0.0077           | 0.1847           | 0                | 1.56       | 0.0094           | 0.0696           | 27               |
| Common range              | 1.48       | 0.0059           | 0.0968           | 2                | 1.31                      | 0.0076           | 0.1858           | 0                | 1.56       | 0.0094           | 0.0699           | 27               |
| Stürmer                   | 1.91       | 0.0050           | 0.0072           | 91               | 1.98                      | 0.0059           | 0.0060           | 95               | 2.01       | 0.0082           | 0.0082           | 95               |
| Walker                    | 1.79       | 0.0054           | 0.0179           | 68               | 2.00                      | 0.0068           | 0.0068           | 96               | 2.00       | 0.0109           | 0.0109           | 96               |
| Crump                     | 1.48       | 0.0059           | 0.0964           | 2                | 1.38                      | 0.0074           | 0.1442           | 1                | 1.93       | 0.0073           | 0.0085           | 93               |
| Matching weights          |            |                  |                  |                  |                           |                  |                  |                  |            |                  |                  |                  |
| No trimming               | 1.56       | 0.0050           | 0.0678           | 7                | 1.42                      | 0.0063           | 0.1238           | 1                | 1.66       | 0.0078           | 0.0422           | 44               |

|                 |      |        |        |    |      |        |        |    |      |        |        |    |
|-----------------|------|--------|--------|----|------|--------|--------|----|------|--------|--------|----|
| Common range    | 1.56 | 0.0050 | 0.0680 | 7  | 1.42 | 0.0063 | 0.1243 | 1  | 1.66 | 0.0078 | 0.0423 | 44 |
| Stürmer         | 1.92 | 0.0048 | 0.0065 | 92 | 1.98 | 0.0058 | 0.0059 | 96 | 2.00 | 0.0082 | 0.0083 | 95 |
| Walker          | 1.82 | 0.0050 | 0.0141 | 74 | 2.00 | 0.0068 | 0.0068 | 96 | 2.00 | 0.0110 | 0.0110 | 96 |
| Crump           | 1.56 | 0.0051 | 0.0678 | 7  | 1.48 | 0.0062 | 0.0975 | 3  | 1.95 | 0.0069 | 0.0076 | 94 |
| Entropy weights |      |        |        |    |      |        |        |    |      |        |        |    |
| No trimming     | 1.46 | 0.0062 | 0.1058 | 2  | 1.25 | 0.0089 | 0.2270 | 0  | 1.45 | 0.0126 | 0.1139 | 17 |
| Common range    | 1.46 | 0.0062 | 0.1064 | 2  | 1.25 | 0.0088 | 0.2292 | 0  | 1.45 | 0.0125 | 0.1152 | 16 |
| Stürmer         | 1.91 | 0.0050 | 0.0074 | 91 | 1.97 | 0.0059 | 0.0061 | 95 | 2.01 | 0.0083 | 0.0083 | 95 |
| Walker          | 1.78 | 0.0055 | 0.0188 | 67 | 2.00 | 0.0068 | 0.0068 | 96 | 2.00 | 0.0109 | 0.0109 | 96 |
| Crump           | 1.46 | 0.0062 | 0.1057 | 2  | 1.33 | 0.0081 | 0.1725 | 1  | 1.92 | 0.0077 | 0.0096 | 92 |

IPTW: Inverse probability of treatment weights; average treatment effect in the overall population; SMR-treated weights: Standardized mortality ratio weights; average treatment effect in the treated; SMR-untreated weights: Standardized mortality ratio weights; average treatment effect in the untreated; RR: incidence rate ratio; AUC: Area under the receiver operating characteristics curve (c-statistic)

<sup>a</sup> True RR=2.0; treatment prevalence = 50%

<sup>b</sup> Variance of treatment effect estimates [ $\log(\text{RR})$ ] over 5,000 simulated studies

<sup>c</sup> Mean squared error; mean of [ $\log(\text{RR}) - \log(2.0)$ ]<sup>2</sup> over 5,000 simulated studies

<sup>d</sup> Percent of simulated studies in which the 95% confidence interval (CI) includes the true value (RR=2.0)

<sup>e</sup> Common range: restricting to positivity; Stürmer: asymmetric trimming at 5<sup>th</sup> percentile of treated and 95<sup>th</sup> percentile of untreated; Walker: preference score trimming below 0.3 and above 0.7; and Crump: propensity score trimming below 0.1 and above 0.9

**Web Figure 1.** Simulation setup from Stürmer et al. (10).

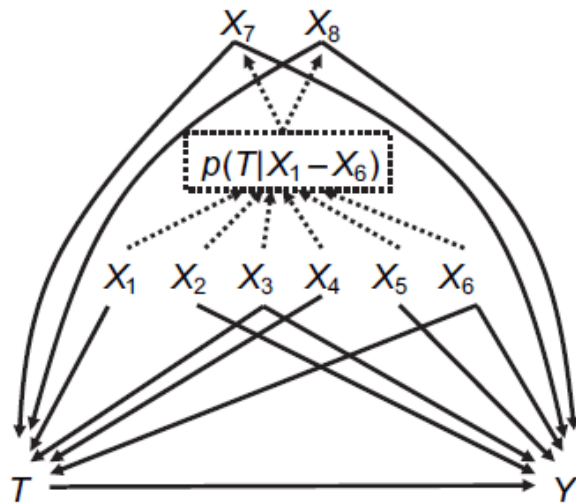

**Figure 1.** Conceptual diagram of a simulation study depicting treatment ( $T$ ) and outcome ( $Y$ ) as a function of measured covariates ( $X_1$ – $X_6$ ) and unmeasured covariates ( $X_7$  and  $X_8$ ). The solid lines represent causal associations, and the dashed lines represent noncausal associations used in the 2-step simulation process to mimic treatment contrary to prediction by measured covariates ( $X_1$ – $X_6$ ).

**Web Figure 2.** Density plots of propensity score distributions in treated (blue) and untreated (red) in the basic scenario without unmeasured confounding according to the c-statistic of propensity score model; left panel:  $c=0.75$ ; middle panel:  $c=0.85$ ; right panel:  $c=0.65$ ; all based on a single imputation of a population with  $N=1,000,000$ .

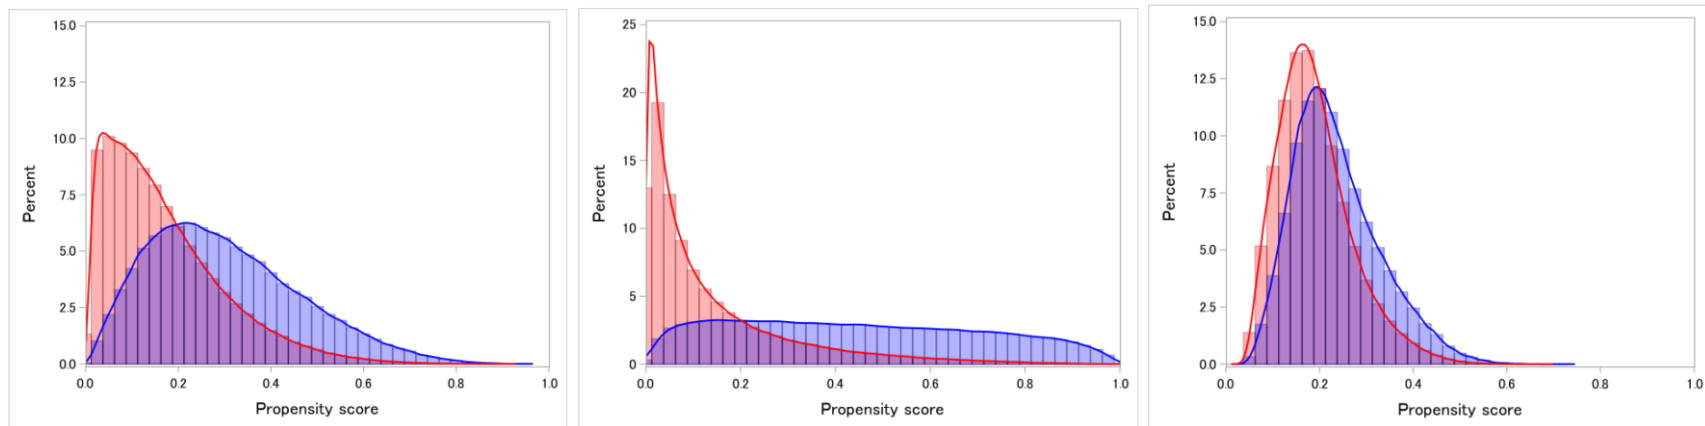

Supplement: web_material_kwab041.pdf [file web_material_kwab041.pdf]
